# Supplementary material for: Identification of basic/helix-loop-helix transcription factors reveals candidate genes involved in anthocyanin biosynthesis from the strawberry white-flesh mutant
Source: PubMed Central journal article supplement (PMC5807450; doi:10.1038/s41598-018-21136-z), 2018-02-09
Supplement: 41598_2018_21136_MOESM1_ESM.pdf [file 41598_2018_21136_MOESM1_ESM.pdf]

**Identification of basic/helix-loop-helix transcription factors reveals candidate genes involved in anthocyanin biosynthesis from the strawberry white-flesh mutant**

Fengli Zhao<sup>1,2</sup>, Gang Li<sup>1,2</sup>, Panpan Hu<sup>1,2</sup>, Xia Zhao<sup>1,2</sup>, Liangjie Li<sup>1,2</sup>, Wei Wei<sup>3</sup>, Jiayue Feng<sup>3</sup>, Houcheng Zhou<sup>1,2\*</sup>

**Supplemental materials**

**Supplementary Figure 1.** Multiple sequence alignment of the bHLH domain among *FvbHLH* genes.

**Supplementary Figure 2.** Structural analysis of strawberry bHLH transcription factors. The gene structure is shown on the left, with exons and untranslated regions (UTRs) represented by blue-corner rectangles and red rectangles, respectively. The protein motif analysis of strawberry bHLH genes are shown on the right. 1-24 motif was denoted by rectangle with different colors on the lower right corner.

**Supplementary Figure 3.** Sequence logo of the FvbHLH domain by MEME.

**Supplementary Figure 4.** Analysis of semi-quantitative RT-PCR for expression profiles of 113 FvbHLH genes in response to ABA treatment. *FvActin*, *FvRib413* and *FvGAPDH2* were used as an internal control.

**Supplementary Figure 5.** Analysis of semi-quantitative RT-PCR for expression profiles of 113 FvbHLH genes in response to Eth treatment. *FvActin*, *FvRib413* and *FvGAPDH2* were used as an internal control.

### Supplemental Figure 1

|           |                                                                                   |     |
|-----------|-----------------------------------------------------------------------------------|-----|
| FvBHLH001 | RDTEGSHAVLEKRSSEKLN..EREMTIRAKITFSIN.....FIDRVSLDDTEVYLQDIFERVQHEESCRESTDITETR    | 505 |
| FvBHLH002 | EEFGNHLSEKRSSEKLN..EREMTIRASIFPSIS.....FIDRVSLDDTEVYLQDIFERVQHEESCRESDATETR       | 469 |
| FvBHLH006 | QELMNVLYCERRSSEKLN..ERFIIHSLSVFTS.....KDRVSLDDDAEYVLRDLEKRWVEEETSQSDIEA           | 500 |
| FvBHLH029 | DELSANVLAERRSSEKLN..ERFIIHSLSVFTT.....KMDKASILDGAEVYVQDQKPHAKKEIEMEARVHLEDDQ      | 542 |
| FvBHLH098 | KRSTINKSSESDVEKLIENEKLMVRSMSNT.....EIDKASILDGAEVYVQDQKPHAKKEIEMEARVHLEDDQ         | 511 |
| FvBHLH092 | ...RSRTLVSERRSSEKLN..DKLYALRSIVENIT.....KMDKASILDGAEVYVQDQKPHAKKEIEMEARVHLEDDQ    | 204 |
| FvBHLH003 | ...RSRTLVSERRSSEKLN..DKLYALRSIVENIT.....KMDKASILDGAEVYVQDQKPHAKKEIEMEARVHLEDDQ    | 204 |
| FvBHLH001 | ...QSKNLAERRSSEKLN..DKLYALRSIVENIT.....KMDKASILDGAEVYVQDQKPHAKKEIEMEARVHLEDDQ     | 397 |
| FvBHLH032 | ...QAFNLAERRSSEKLN..DKLYALRSIVENIT.....KMDKASILDGAEVYVQDQKPHAKKEIEMEARVHLEDDQ     | 467 |
| FvBHLH044 | ...NHSEAEERRRERIN..AHLSTIRGLVTECTE.....KMDKASILDGAEVYVQDQKPHAKKEIEMEARVHLEDDQ     | 140 |
| FvBHLH037 | ...NHSEAEERRRERIN..SHLDKIRSLPFCNS.....KMDKASILDGAEVYVQDQKPHAKKEIEMEARVHLEDDQ      | 154 |
| FvBHLH055 | ...SHSEAEERRRERIN..SHLDKIRSLPFCNS.....KMDKASILDGAEVYVQDQKPHAKKEIEMEARVHLEDDQ      | 227 |
| FvBHLH043 | ...SLSPQSIARERRRRTIT..EKTNEIKGLVECC.....GSKMNTAEMLQAAVYVYRIFQAQVAMKMDSVKANKGH     | 230 |
| FvBHLH094 | ...VSPQSIARERRRRTIT..EKTNEIKGLVECC.....GSKMNTAEMLQAAVYVYRIFQAQVAMKMDSVKANKGH      | 223 |
| FvBHLH008 | ...AAEVHNLSEKRRSRIN..EMMKALQNLIN.....SNKTRASMLDEATEYVLRDLEKRWVEEETSQSDIEA         | 214 |
| FvBHLH013 | ...FSKNNLAERRSSEKLN..DRLSMRSLVEKIS.....KMDRTSILGDTIDYMKELLERINNKIQEERTEENTNQ      | 260 |
| FvBHLH010 | ESQRMTHIAVERNRRKQMN..DYLVSRSMEFAS.....YQCRGDCASIVGGAEVYVQDQKPHAKKEIEMEARVHLEDDQ   | 193 |
| FvBHLH095 | ESQRMTHIAVERNRRKQMN..DHLNVRSLMFEPS.....YQCRGDCASIVGGAEVYVQDQKPHAKKEIEMEARVHLEDDQ  | 273 |
| FvBHLH099 | ESQRMTHIAVERNRRKQMN..DHLNVRSLMFEPS.....YQCRGDCASIVGGAEVYVQDQKPHAKKEIEMEARVHLEDDQ  | 223 |
| FvBHLH053 | ...MASHIAVERNRRKQMN..EHLKVLRTILTECF.....YKRGDQASIGGVYVEVNEIQEQLQVLSLAQRKRRAEFG    | 64  |
| FvBHLH101 | MAKRLNHNASERRRKKNIN..NLYSSIRSLVEAD.....HAKRSLIPATVSRVLRVIFELQCEVGLIQRDELSSNF      | 139 |
| FvBHLH045 | ...RACRKTIEKRRNMK..ALYSEINSLPHEH.....QSREVTSDFQDAAVYVYRIFQAQVAMKMDSVKANKGH        | 82  |
| FvBHLH067 | ...KLRDRTVERNRISQMK..GLCFPLASVFEQVFRSSKSEMMTQDQDLAASVYVYRIFQAQVAMKMDSVKANKGH      | 85  |
| FvBHLH028 | MVKRLNHNASERRRKKNIN..NLYSSIRSLVEAD.....HAKRSLIPATVSRVLRVIFELQCEVGLIQRDELSSNF      | 138 |
| FvBHLH087 | ...KIERRVIEKRRNMK..ILYSSIRSLVEAD.....HAKRSLIPATVSRVLRVIFELQCEVGLIQRDELSSNF        | 139 |
| FvBHLH105 | ...KIMRNDKVEKRSQMLA..IRTASIRSLVLE.....SIKGRSLSEHVEAWYVYRIFQAQVAMKMDSVKANKGH       | 93  |
| FvBHLH106 | ...KRMHREKRRSQQMA..TLVASIRSLVFE.....SMRGRSLSDHNEAVYVYRIFQAQVAMKMDSVKANKGH         | 87  |
| FvBHLH107 | ...KRMHREKRRSQQMA..TLVASIRSLVFE.....SMRGRSLSDHNEAVYVYRIFQAQVAMKMDSVKANKGH         | 146 |
| FvBHLH045 | KVKKIHRDIKQCEKEMT..TLVASIRSLVFE.....YKGRSISTSDHNEAVYVYRIFQAQVAMKMDSVKANKGH        | 155 |
| FvBHLH090 | ...RLHSETKQRRSSEKLN..ERFQHEBIEIENQD.....KMDKASILDGAEVYVQDQKPHAKKEIEMEARVHLEDDQ    | 100 |
| FvBHLH051 | ...SRQSSGTSFISDDQII..ELVSKIRQLVFEIRD.....RSDKVSASVQLQTCVYRN...HREVDLSERLS         | 72  |
| FvBHLH058 | ...SRQSSGS..FSIDDDQII..ELVSKIRQLVFEIRD.....RSDKVSASVQLQTCVYRN...HREVDLSERLS       | 72  |
| FvBHLH040 | ...SRQSSGS..FSIDDDQII..ELVSKIRQLVFEIRD.....RSDKVSASVQLQTCVYRN...HREVDLSERLS       | 71  |
| FvBHLH073 | ...SRQSSGS..RISDDQIN..DLVTKICQLLEIRNS.....RSDKVSASVQLQTCVYRN...HREVDLSERLS        | 72  |
| FvBHLH023 | AARKMQKADREKRRDRLN..EHFMLEGNLDPFRF.....KMDKASILDGAEVYVQDQKPHAKKEIEMEARVHLEDDQ     | 113 |
| FvBHLH047 | SSATSSKAKREKRRDRLN..DKEFLGSLIEGRFPF.....KMDKASILDGAEVYVQDQKPHAKKEIEMEARVHLEDDQ    | 140 |
| FvBHLH109 | CNVSSKAKREKRRDRLN..DKEFLGSLIEGRFPF.....KMDKASILDGAEVYVQDQKPHAKKEIEMEARVHLEDDQ     | 148 |
| FvBHLH006 | SARVQKADREKRRDRLN..EHFMLEGNLDPFRF.....KMDKASILDGAEVYVQDQKPHAKKEIEMEARVHLEDDQ      | 112 |
| FvBHLH041 | ...ETFSPLFTFKVREKLG..DRITALCQLVSP.....FGKTDASVLEAEYIKFIHQVSVLSNF..YMKSGAAI        | 429 |
| FvBHLH046 | ...ETSSTLPAFKVREKMG..DRITALCQLVSP.....FGKTDASVLEAEYIKFIHQVSVLSNF..YMKSGAAI        | 395 |
| FvBHLH049 | WCGSGAKAKREKRRDRLN..DKEFLGSLIEGRFPF.....KMDKASILDGAEVYVQDQKPHAKKEIEMEARVHLEDDQ    | 143 |
| FvBHLH068 | LKKSLEHNGSERRNRNAIK..DKIHILGGLVENCTR..IYHQTDQASISLSEVYVYRIFQAQVAMKMDSVKANKGH      | 265 |
| FvBHLH007 | FVVAFFRGRSLARERRKTL..DKTRCQLVFEIRD.....RMDTAMLETAHRVYVYRIFQAQVAMKMDSVKANKGH       | 280 |
| FvBHLH108 | ...DHELIHYTERRRKMR..NMFANLHALLEQLF.....SKADSTVDEAVYVYRIFQAQVAMKMDSVKANKGH         | 192 |
| FvBHLH102 | ...DNRKQLQVFRSQKLS..DKITALCQLVSP.....KMDKASILDGAEVYVQDQKPHAKKEIEMEARVHLEDDQ       | 237 |
| FvBHLH097 | ...EPLNHVEAEKRRKLN..QRFYARAVVENIS.....KMDKASILDGAEVYVQDQKPHAKKEIEMEARVHLEDDQ      | 511 |
| FvBHLH096 | ...DPLNVEAEKRRKLN..HRFYARAVVENIS.....KMDKASILDGAEVYVQDQKPHAKKEIEMEARVHLEDDQ       | 373 |
| FvBHLH011 | ...DHLVEAEKRRKLN..QRFYARAVVENIS.....KMDKASILDGAEVYVQDQKPHAKKEIEMEARVHLEDDQ        | 239 |
| FvBHLH022 | ...VHMAERRRRERIN..QRFYARAVVENIS.....KMDKASILDGAEVYVQDQKPHAKKEIEMEARVHLEDDQ        | 225 |
| FvBHLH012 | ...DHMAERRRRERIN..QRFYARAVVENIS.....KMDKASILDGAEVYVQDQKPHAKKEIEMEARVHLEDDQ        | 238 |
| FvBHLH001 | ...AAAHNQSERRRKKNIN..QRMKILQVIVFG.....KMDKASILDGAEVYVQDQKPHAKKEIEMEARVHLEDDQ      | 340 |
| FvBHLH019 | ...AAAHNQSERRRKKNIN..QRMKILQVIVFG.....KMDKASILDGAEVYVQDQKPHAKKEIEMEARVHLEDDQ      | 220 |
| FvBHLH074 | ...ATDPSHLAERVRERIS..ERMKILQVIVFG.....KMDKASILDGAEVYVQDQKPHAKKEIEMEARVHLEDDQ      | 221 |
| FvBHLH063 | ...ATDPSHLAERVRERIS..ERMKILQVIVFG.....KMDKASILDGAEVYVQDQKPHAKKEIEMEARVHLEDDQ      | 335 |
| FvBHLH034 | ...ATDPSHLAERVRERIS..ERMKILQVIVFG.....KMDKASILDGAEVYVQDQKPHAKKEIEMEARVHLEDDQ      | 238 |
| FvBHLH060 | ...ATDPSHLAERVRERIS..ERMKILQVIVFG.....KMDKASILDGAEVYVQDQKPHAKKEIEMEARVHLEDDQ      | 250 |
| FvBHLH083 | ...ATDPSHLAERVRERIS..ERMKILQVIVFG.....KMDKASILDGAEVYVQDQKPHAKKEIEMEARVHLEDDQ      | 316 |
| FvBHLH005 | ...ATDPSHLAERVRERIS..ERMKILQVIVFG.....KMDKASILDGAEVYVQDQKPHAKKEIEMEARVHLEDDQ      | 427 |
| FvBHLH048 | ...ATDPSHLAERVRERIS..ERMKILQVIVFG.....KMDKASILDGAEVYVQDQKPHAKKEIEMEARVHLEDDQ      | 423 |
| FvBHLH093 | ...ATDPSHLAERVRERIS..ERMKILQVIVFG.....KMDKASILDGAEVYVQDQKPHAKKEIEMEARVHLEDDQ      | 221 |
| FvBHLH036 | ...SKDPQVAARHRRERIS..ERIRILQVIVFG.....KMDKASILDGAEVYVQDQKPHAKKEIEMEARVHLEDDQ      | 201 |
| FvBHLH033 | ...ATDPSHLAERVRERIS..ERIRILQVIVFG.....KMDKASILDGAEVYVQDQKPHAKKEIEMEARVHLEDDQ      | 356 |
| FvBHLH062 | EHFRSRLNLAERRRNRK..EGELALRALVFKIT.....KMDKASILDGAEVYVQDQKPHAKKEIEMEARVHLEDDQ      | 343 |
| FvBHLH052 | ...ATDPSHLAERVRERIS..ERMKILQVIVFG.....KMDKASILDGAEVYVQDQKPHAKKEIEMEARVHLEDDQ      | 345 |
| FvBHLH014 | ...SDDPQVAARHRRERIS..ERIRILQVIVFG.....KMDKASILDGAEVYVQDQKPHAKKEIEMEARVHLEDDQ      | 214 |
| FvBHLH086 | ...SDDPQVAARHRRERIS..ERIRILQVIVFG.....KMDKASILDGAEVYVQDQKPHAKKEIEMEARVHLEDDQ      | 98  |
| FvBHLH071 | ...VAAHNQSERRRKKNIN..QRMKILQVIVFG.....KMDKASILDGAEVYVQDQKPHAKKEIEMEARVHLEDDQ      | 257 |
| FvBHLH009 | ...SKDPQVAARHRRERIS..ERIRILQVIVFG.....KMDKASILDGAEVYVQDQKPHAKKEIEMEARVHLEDDQ      | 225 |
| FvBHLH076 | ...ATDQSVYARHRRERIS..ERIRILQVIVFG.....KMDKASILDGAEVYVQDQKPHAKKEIEMEARVHLEDDQ      | 301 |
| FvBHLH021 | ...ASDPQSVYARHRRERIS..ERIRILQVIVFG.....KMDKASILDGAEVYVQDQKPHAKKEIEMEARVHLEDDQ     | 323 |
| FvBHLH103 | ...ASKSHSQAEKRRDRIN..AQLATLRLVFEIRD.....KMDKASILDGAEVYVQDQKPHAKKEIEMEARVHLEDDQ    | 135 |
| FvBHLH026 | ...AAEVHNLSEKRRSRIN..EMMTRILQVIVFG.....KMDKASILDGAEVYVQDQKPHAKKEIEMEARVHLEDDQ     | 374 |
| FvBHLH089 | ...AAEVHNLSEKRRSRIN..EMMTRILQVIVFG.....KMDKASILDGAEVYVQDQKPHAKKEIEMEARVHLEDDQ     | 411 |
| FvBHLH020 | ELAIDPRTYARRRKKNIN..SLRLILQVIVFG.....KMDKASILDGAEVYVQDQKPHAKKEIEMEARVHLEDDQ       | 255 |
| FvBHLH092 | ...ATDPSHLAERVRERIS..ERMKILQVIVFG.....KMDKASILDGAEVYVQDQKPHAKKEIEMEARVHLEDDQ      | 261 |
| FvBHLH042 | FYSGNQLVMPDSYSSNSARSTFDTISFNRLGLFDHVVH.....KMDKASILDGAEVYVQDQKPHAKKEIEMEARVHLEDDQ | 374 |
| FvBHLH064 | KGLPANKLMARRRKKNIN..DRIVMERSVFEIS.....KMDKASILDGAEVYVQDQKPHAKKEIEMEARVHLEDDQ      | 109 |
| FvBHLH059 | SRAAEVHNLSEKRRSRIN..EMMTRILQVIVFG.....KMDKASILDGAEVYVQDQKPHAKKEIEMEARVHLEDDQ      | 412 |
| FvBHLH084 | ...PSSAQPTFYVREKLG..DRITALCQLVSP.....KMDKASILDGAEVYVQDQKPHAKKEIEMEARVHLEDDQ       | 506 |
| FvBHLH079 | ...PSSAQPTFYVREKLG..DRITALCQLVSP.....KMDKASILDGAEVYVQDQKPHAKKEIEMEARVHLEDDQ       | 501 |
| FvBHLH038 | LESRTCPFLVREKLG..DRITALCQLVSP.....KMDKASILDGAEVYVQDQKPHAKKEIEMEARVHLEDDQ          | 400 |
| FvBHLH050 | ...MASKNIVSERRRKKNIN..ERLFAERAVVENIS.....KMDKASILDGAEVYVQDQKPHAKKEIEMEARVHLEDDQ   | 116 |
| FvBHLH100 | ...KTRKAFATERRRKKNIN..DFQMLRELIVENET.....KMDKASILDGAEVYVQDQKPHAKKEIEMEARVHLEDDQ   | 323 |
| FvBHLH030 | ...SAGQKTLVDRQARRIRAEIRLETEKILHES.....VEGGQFVLDDVDHIFQLQIKDLSRNLGGAEVAE           | 238 |
| FvBHLH004 | ITSQJLHMISERRRKKNIN..ESFHSLSLILPFG.....KMDKASILDGAEVYVQDQKPHAKKEIEMEARVHLEDDQ     | 485 |
| FvBHLH085 | ENQRMTIHAVERNRRKQMN..EYLSALRSIMFDS.....YQCRGDCASIVGGAEVYVQDQKPHAKKEIEMEARVHLEDDQ  | 199 |
| FvBHLH091 | ...ATHPRISIAERVRERIS..ERMKILQVIVFG.....KMDKASILDGAEVYVQDQKPHAKKEIEMEARVHLEDDQ     | 308 |
| FvBHLH016 | ...AKKHSEERRRERIN..SQVAALRILLENLI.....KMDKASILDGAEVYVQDQKPHAKKEIEMEARVHLEDDQ      | 113 |
| FvBHLH072 | ...SNMYTEKNELEDTSALLETQIERIQSLEQER.....VFQSRFLNVFPVVAHETGNCGLIFQAGSALQSP          | 171 |
| FvBHLH061 | ...PNETQFSKRCRNDQCS..DQLKFAENYQHF.....LLQTSSTTTTEGGFRLEISENFKAKKISSDQKSTFS        | 270 |
| FvBHLH111 | KRRAKPGESTRFRFRDRQIQDRMKDGMINGGG.....KQCSDALDRITVYVYRIFQAQVAMKMDSVKANKGH          | 631 |
| FvBHLH081 | EQRMTHIAVERNRRKQMN..EHLVRSIMFECP.....YQCRGDCASIVGGAEVYVQDQKPHAKKEIEMEARVHLEDDQ    | 171 |
| FvBHLH104 | ...DLSMT..KRRKELG..ERIVALCQLVSP.....YKGTDTASVLEAEYIKFIHQVSVLSNF..YMKSGAAI         | 110 |
| FvBHLH024 | ...ATDPSHLAERVRERIS..ERIRILQVIVFG.....KMDKASILDGAEVYVQDQKPHAKKEIEMEARVHLEDDQ      | 204 |
| FvBHLH069 | ...ATDPSHLAERVRERIS..ERMKILQVIVFG.....KMDKASILDGAEVYVQDQKPHAKKEIEMEARVHLEDDQ      | 230 |
| FvBHLH082 | ...ATDPSHLAERVRERIS..ERMKILQVIVFG.....KMDKASILDGAEVYVQDQKPHAKKEIEMEARVHLEDDQ      | 250 |
| FvBHLH054 | ...ATDPSHLAERVRERIS..ERMKILQVIVFG.....KMDKASILDGAEVYVQDQKPHAKKEIEMEARVHLEDDQ      | 430 |
| FvBHLH018 | ...DRFAAG..KFR..EKLK..ERILALCQLVSP.....FGKTDASVLEAEYIKFIHQVSVLSNF..YMKSGAAI       | 216 |
| FvBHLH075 | ENQRMTIHAVERNRRKQMN..EYLSALRSIMFDS.....YQCRGDCASIVGGAEVYVQDQKPHAKKEIEMEARVHLEDDQ  | 195 |
| FvBHLH088 | ...EPLNHVEAEKRRKLN..QRFYARAVVENIS.....KMDKASILDGAEVYVQDQKPHAKKEIEMEARVHLEDDQ      | 271 |
| FvBHLH078 | ...FSKNNLAERRSSEKLN..DRLSMRSLVEKIS.....KMDRTSILGDTIDYMKELLERINNKIQEERTEENTNQ      | 574 |
| FvBHLH017 | ...ATDPSHLAERVRERIS..ERMKILQVIVFG.....KMDKASILDGAEVYVQDQKPHAKKEIEMEARVHLEDDQ      | 248 |
| FvBHLH025 | ...EPLNHVEAEKRRKLN..QRFYARAVVENIS.....KMDKASILDGAEVYVQDQKPHAKKEIEMEARVHLEDDQ      | 291 |
| FvBHLH015 | ...RGRFHMINERRRKKNIN..QRFYARAVVENIS.....KMDKASILDGAEVYVQDQKPHAKKEIEMEARVHLEDDQ    | 414 |
| FvBHLH010 | NPRSKHSATEKRRRKNIN..DFQMLRELIVENET.....KMDKASILDGAEVYVQDQKPHAKKEIEMEARVHLEDDQ     | 150 |
| FvBHLH070 | ...ATDPSHLAERVRERIS..ERMKILQVIVFG.....KMDKASILDGAEVYVQDQKPHAKKEIEMEARVHLEDDQ      | 334 |
| FvBHLH035 | ...SARSKHSATEKRRRKNIN..DFQMLRELIVENET.....KMDKASILDGAEVYVQDQKPHAKKEIEMEARVHLEDDQ  | 430 |
| FvBHLH057 | ...SARSKHSATEKRRRKNIN..DFQMLRELIVENET.....KMDKASILDGAEVYVQDQKPHAKKEIEMEARVHLEDDQ  | 115 |
| FvBHLH080 | ...EPLNHVEAEKRRKLN..QRFYARAVVENIS.....KMDKASILDGAEVYVQDQKPHAKKEIEMEARVHLEDDQ      | 194 |
| FvBHLH112 | ...KMKTKLGRMKKRRRKNIN..DRLSMRSLVEKIS.....KMDRTSILGDTIDYMKELLERINNKIQEERTEENTNQ    | 100 |
| FvBHLH113 | ...KMKTKLGRMKKRRRKNIN..DRLSMRSLVEKIS.....KMDRTSILGDTIDYMKELLERINNKIQEERTEENTNQ    | 171 |
| FvBHLH039 | ...FNEGNNKETSSEKLN..EDSDDIDALLSLEE.....EEQEYDEEYSTARHGNYSSEYSSCSYGLKTR            | 168 |

Supplemental Figure 2

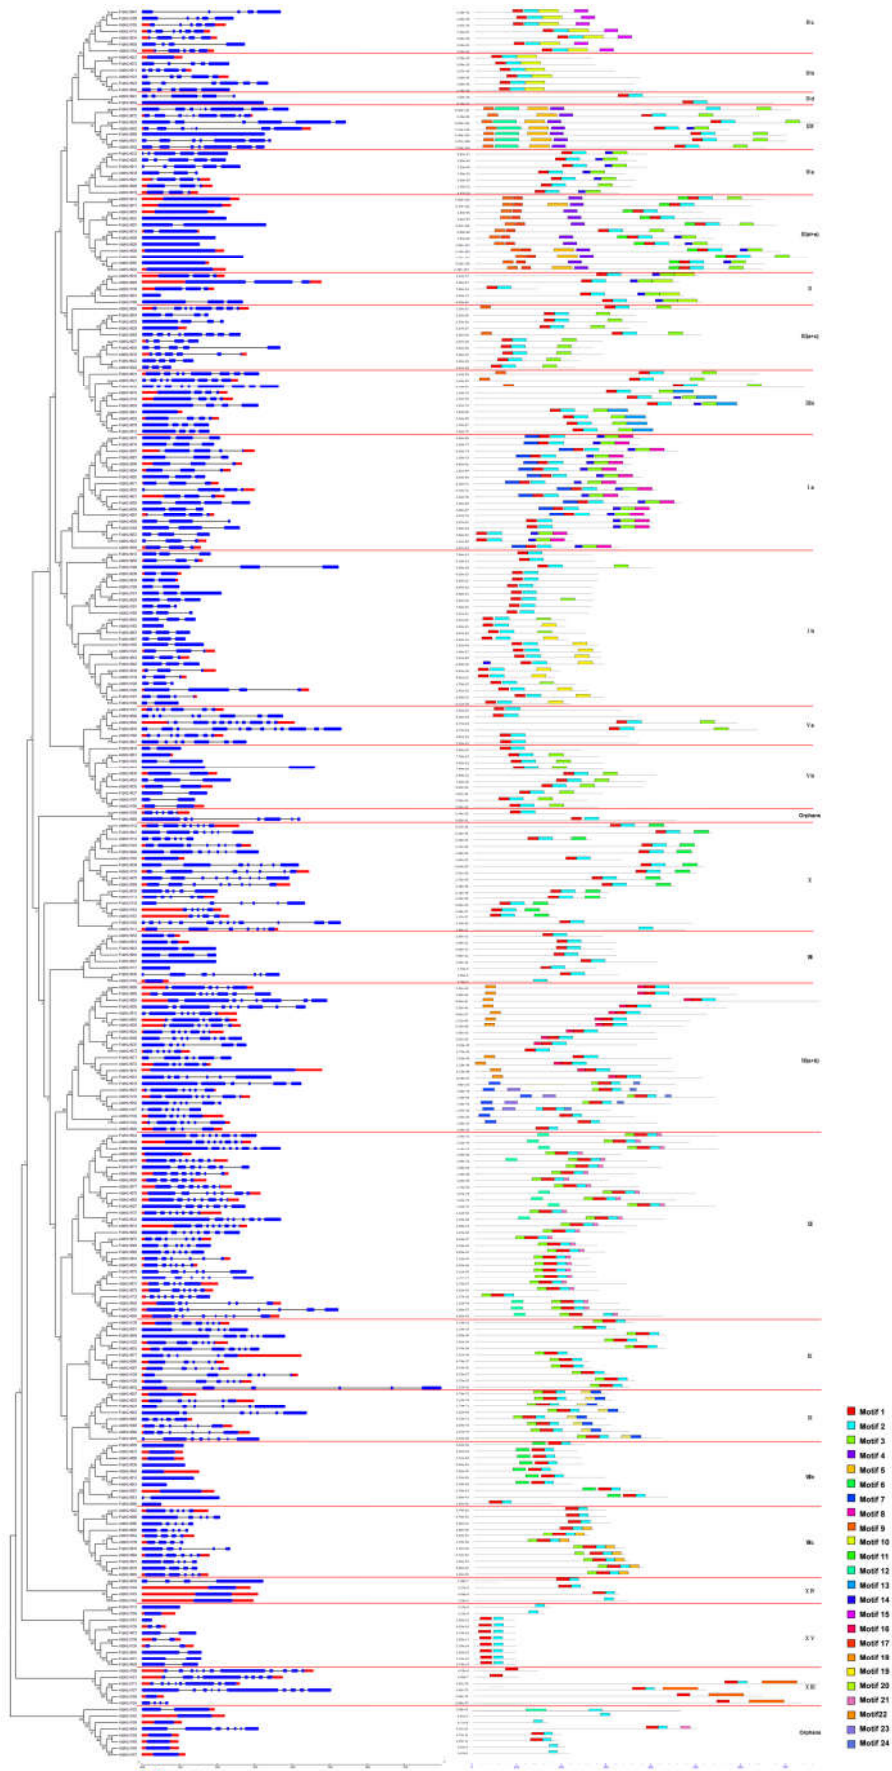



Supplemental Figure 3

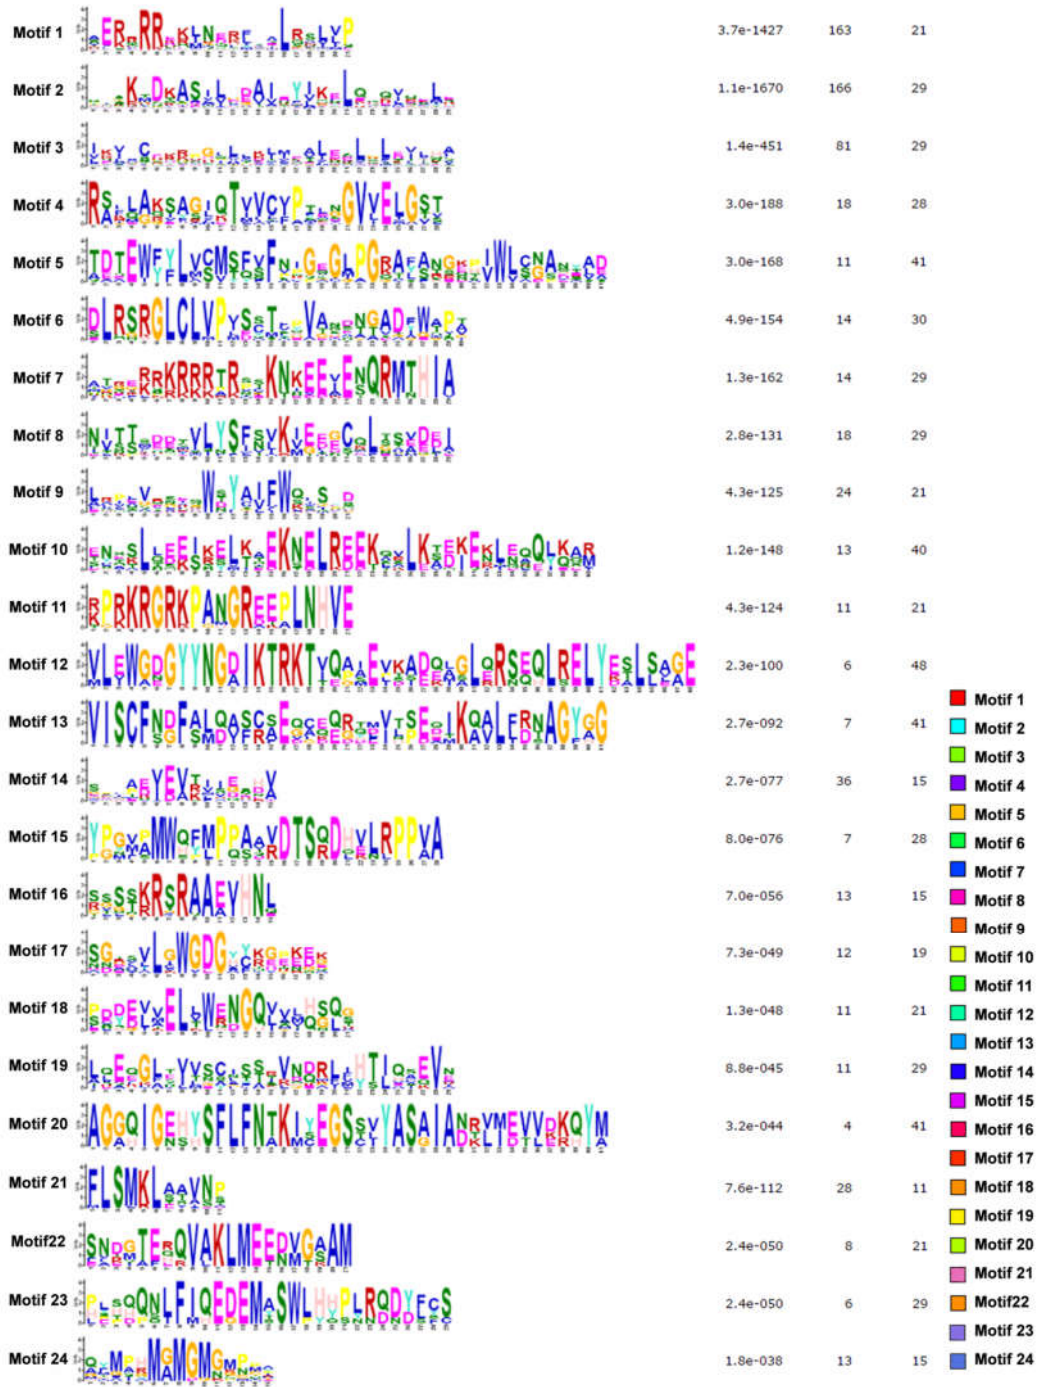

# Supplemental Figure 4

| ABA                                  |     |   |   |                                    |   |   |    |          |                                     |   |   |   |   |   |    |          |     |   |   |   |   |   |    |
|--------------------------------------|-----|---|---|------------------------------------|---|---|----|----------|-------------------------------------|---|---|---|---|---|----|----------|-----|---|---|---|---|---|----|
| Fragaria X ananassa Duch 'BenHoppet' |     |   |   | Fragaria X ananassa Duch 'Kluisba' |   |   |    |          | Fragaria X ananassa 'Snoe Princess' |   |   |   |   |   |    |          |     |   |   |   |   |   |    |
| Mock                                 | 8.0 | 1 | 2 | 4                                  | 6 | 8 | 12 | Mock     | 8.0                                 | 1 | 2 | 4 | 6 | 8 | 12 | Mock     | 8.0 | 1 | 2 | 4 | 6 | 8 | 12 |
| FABL311                              |     |   |   |                                    |   |   |    | FABL311  |                                     |   |   |   |   |   |    | FABL311  |     |   |   |   |   |   |    |
| FABL312                              |     |   |   |                                    |   |   |    | FABL312  |                                     |   |   |   |   |   |    | FABL312  |     |   |   |   |   |   |    |
| FABL313                              |     |   |   |                                    |   |   |    | FABL313  |                                     |   |   |   |   |   |    | FABL313  |     |   |   |   |   |   |    |
| FABL314                              |     |   |   |                                    |   |   |    | FABL314  |                                     |   |   |   |   |   |    | FABL314  |     |   |   |   |   |   |    |
| FABL315                              |     |   |   |                                    |   |   |    | FABL315  |                                     |   |   |   |   |   |    | FABL315  |     |   |   |   |   |   |    |
| FABL316                              |     |   |   |                                    |   |   |    | FABL316  |                                     |   |   |   |   |   |    | FABL316  |     |   |   |   |   |   |    |
| FABL317                              |     |   |   |                                    |   |   |    | FABL317  |                                     |   |   |   |   |   |    | FABL317  |     |   |   |   |   |   |    |
| FABL318                              |     |   |   |                                    |   |   |    | FABL318  |                                     |   |   |   |   |   |    | FABL318  |     |   |   |   |   |   |    |
| FABL319                              |     |   |   |                                    |   |   |    | FABL319  |                                     |   |   |   |   |   |    | FABL319  |     |   |   |   |   |   |    |
| FABL3110                             |     |   |   |                                    |   |   |    | FABL3110 |                                     |   |   |   |   |   |    | FABL3110 |     |   |   |   |   |   |    |
| FABL3111                             |     |   |   |                                    |   |   |    | FABL3111 |                                     |   |   |   |   |   |    | FABL3111 |     |   |   |   |   |   |    |
| FABL3112                             |     |   |   |                                    |   |   |    | FABL3112 |                                     |   |   |   |   |   |    | FABL3112 |     |   |   |   |   |   |    |
| FABL3113                             |     |   |   |                                    |   |   |    | FABL3113 |                                     |   |   |   |   |   |    | FABL3113 |     |   |   |   |   |   |    |
| FABL3114                             |     |   |   |                                    |   |   |    | FABL3114 |                                     |   |   |   |   |   |    | FABL3114 |     |   |   |   |   |   |    |
| FABL3115                             |     |   |   |                                    |   |   |    | FABL3115 |                                     |   |   |   |   |   |    | FABL3115 |     |   |   |   |   |   |    |
| FABL3116                             |     |   |   |                                    |   |   |    | FABL3116 |                                     |   |   |   |   |   |    | FABL3116 |     |   |   |   |   |   |    |
| FABL3117                             |     |   |   |                                    |   |   |    | FABL3117 |                                     |   |   |   |   |   |    | FABL3117 |     |   |   |   |   |   |    |
| FABL3118                             |     |   |   |                                    |   |   |    | FABL3118 |                                     |   |   |   |   |   |    | FABL3118 |     |   |   |   |   |   |    |
| FABL3119                             |     |   |   |                                    |   |   |    | FABL3119 |                                     |   |   |   |   |   |    | FABL3119 |     |   |   |   |   |   |    |
| FABL3120                             |     |   |   |                                    |   |   |    | FABL3120 |                                     |   |   |   |   |   |    | FABL3120 |     |   |   |   |   |   |    |
| FABL3121                             |     |   |   |                                    |   |   |    | FABL3121 |                                     |   |   |   |   |   |    | FABL3121 |     |   |   |   |   |   |    |
| FABL3122                             |     |   |   |                                    |   |   |    | FABL3122 |                                     |   |   |   |   |   |    | FABL3122 |     |   |   |   |   |   |    |
| FABL3123                             |     |   |   |                                    |   |   |    | FABL3123 |                                     |   |   |   |   |   |    | FABL3123 |     |   |   |   |   |   |    |
| FABL3124                             |     |   |   |                                    |   |   |    | FABL3124 |                                     |   |   |   |   |   |    | FABL3124 |     |   |   |   |   |   |    |
| FABL3125                             |     |   |   |                                    |   |   |    | FABL3125 |                                     |   |   |   |   |   |    | FABL3125 |     |   |   |   |   |   |    |
| FABL3126                             |     |   |   |                                    |   |   |    | FABL3126 |                                     |   |   |   |   |   |    | FABL3126 |     |   |   |   |   |   |    |
| FABL3127                             |     |   |   |                                    |   |   |    | FABL3127 |                                     |   |   |   |   |   |    | FABL3127 |     |   |   |   |   |   |    |
| FABL3128                             |     |   |   |                                    |   |   |    | FABL3128 |                                     |   |   |   |   |   |    | FABL3128 |     |   |   |   |   |   |    |
| FABL3129                             |     |   |   |                                    |   |   |    | FABL3129 |                                     |   |   |   |   |   |    | FABL3129 |     |   |   |   |   |   |    |
| FABL3130                             |     |   |   |                                    |   |   |    | FABL3130 |                                     |   |   |   |   |   |    | FABL3130 |     |   |   |   |   |   |    |
| FABL3131                             |     |   |   |                                    |   |   |    | FABL3131 |                                     |   |   |   |   |   |    | FABL3131 |     |   |   |   |   |   |    |
| FABL3132                             |     |   |   |                                    |   |   |    | FABL3132 |                                     |   |   |   |   |   |    | FABL3132 |     |   |   |   |   |   |    |
| FABL3133                             |     |   |   |                                    |   |   |    | FABL3133 |                                     |   |   |   |   |   |    | FABL3133 |     |   |   |   |   |   |    |
| FABL3134                             |     |   |   |                                    |   |   |    | FABL3134 |                                     |   |   |   |   |   |    | FABL3134 |     |   |   |   |   |   |    |
| FABL3135                             |     |   |   |                                    |   |   |    | FABL3135 |                                     |   |   |   |   |   |    | FABL3135 |     |   |   |   |   |   |    |
| FABL3136                             |     |   |   |                                    |   |   |    | FABL3136 |                                     |   |   |   |   |   |    | FABL3136 |     |   |   |   |   |   |    |
| FABL3137                             |     |   |   |                                    |   |   |    | FABL3137 |                                     |   |   |   |   |   |    | FABL3137 |     |   |   |   |   |   |    |
| FABL3138                             |     |   |   |                                    |   |   |    | FABL3138 |                                     |   |   |   |   |   |    | FABL3138 |     |   |   |   |   |   |    |
| FABL3139                             |     |   |   |                                    |   |   |    | FABL3139 |                                     |   |   |   |   |   |    | FABL3139 |     |   |   |   |   |   |    |
| FABL3140                             |     |   |   |                                    |   |   |    | FABL3140 |                                     |   |   |   |   |   |    | FABL3140 |     |   |   |   |   |   |    |
| FABL3141                             |     |   |   |                                    |   |   |    | FABL3141 |                                     |   |   |   |   |   |    | FABL3141 |     |   |   |   |   |   |    |
| FABL3142                             |     |   |   |                                    |   |   |    | FABL3142 |                                     |   |   |   |   |   |    | FABL3142 |     |   |   |   |   |   |    |
| FABL3143                             |     |   |   |                                    |   |   |    | FABL3143 |                                     |   |   |   |   |   |    | FABL3143 |     |   |   |   |   |   |    |
| FABL3144                             |     |   |   |                                    |   |   |    | FABL3144 |                                     |   |   |   |   |   |    | FABL3144 |     |   |   |   |   |   |    |
| FABL3145                             |     |   |   |                                    |   |   |    | FABL3145 |                                     |   |   |   |   |   |    | FABL3145 |     |   |   |   |   |   |    |
| FABL3146                             |     |   |   |                                    |   |   |    | FABL3146 |                                     |   |   |   |   |   |    | FABL3146 |     |   |   |   |   |   |    |
| FABL3147                             |     |   |   |                                    |   |   |    | FABL3147 |                                     |   |   |   |   |   |    | FABL3147 |     |   |   |   |   |   |    |
| FABL3148                             |     |   |   |                                    |   |   |    | FABL3148 |                                     |   |   |   |   |   |    | FABL3148 |     |   |   |   |   |   |    |
| FABL3149                             |     |   |   |                                    |   |   |    | FABL3149 |                                     |   |   |   |   |   |    | FABL3149 |     |   |   |   |   |   |    |
| FABL3150                             |     |   |   |                                    |   |   |    | FABL3150 |                                     |   |   |   |   |   |    | FABL3150 |     |   |   |   |   |   |    |
| FABL3151                             |     |   |   |                                    |   |   |    | FABL3151 |                                     |   |   |   |   |   |    | FABL3151 |     |   |   |   |   |   |    |
| FABL3152                             |     |   |   |                                    |   |   |    | FABL3152 |                                     |   |   |   |   |   |    | FABL3152 |     |   |   |   |   |   |    |
| FABL3153                             |     |   |   |                                    |   |   |    | FABL3153 |                                     |   |   |   |   |   |    | FABL3153 |     |   |   |   |   |   |    |
| FABL3154                             |     |   |   |                                    |   |   |    | FABL3154 |                                     |   |   |   |   |   |    | FABL3154 |     |   |   |   |   |   |    |
| FABL3155                             |     |   |   |                                    |   |   |    | FABL3155 |                                     |   |   |   |   |   |    | FABL3155 |     |   |   |   |   |   |    |
| FABL3156                             |     |   |   |                                    |   |   |    | FABL3156 |                                     |   |   |   |   |   |    | FABL3156 |     |   |   |   |   |   |    |
| FABL3157                             |     |   |   |                                    |   |   |    | FABL3157 |                                     |   |   |   |   |   |    | FABL3157 |     |   |   |   |   |   |    |
| FABL3158                             |     |   |   |                                    |   |   |    | FABL3158 |                                     |   |   |   |   |   |    | FABL3158 |     |   |   |   |   |   |    |
| FABL3159                             |     |   |   |                                    |   |   |    | FABL3159 |                                     |   |   |   |   |   |    | FABL3159 |     |   |   |   |   |   |    |
| FABL3160                             |     |   |   |                                    |   |   |    | FABL3160 |                                     |   |   |   |   |   |    | FABL3160 |     |   |   |   |   |   |    |
| FABL3161                             |     |   |   |                                    |   |   |    | FABL3161 |                                     |   |   |   |   |   |    | FABL3161 |     |   |   |   |   |   |    |
| FABL3162                             |     |   |   |                                    |   |   |    | FABL3162 |                                     |   |   |   |   |   |    | FABL3162 |     |   |   |   |   |   |    |
| FABL3163                             |     |   |   |                                    |   |   |    | FABL3163 |                                     |   |   |   |   |   |    | FABL3163 |     |   |   |   |   |   |    |
| FABL3164                             |     |   |   |                                    |   |   |    | FABL3164 |                                     |   |   |   |   |   |    | FABL3164 |     |   |   |   |   |   |    |
| FABL3165                             |     |   |   |                                    |   |   |    | FABL3165 |                                     |   |   |   |   |   |    | FABL3165 |     |   |   |   |   |   |    |
| FABL3166                             |     |   |   |                                    |   |   |    | FABL3166 |                                     |   |   |   |   |   |    | FABL3166 |     |   |   |   |   |   |    |
| FABL3167                             |     |   |   |                                    |   |   |    | FABL3167 |                                     |   |   |   |   |   |    | FABL3167 |     |   |   |   |   |   |    |
| FABL3168                             |     |   |   |                                    |   |   |    | FABL3168 |                                     |   |   |   |   |   |    | FABL3168 |     |   |   |   |   |   |    |
| FABL3169                             |     |   |   |                                    |   |   |    | FABL3169 |                                     |   |   |   |   |   |    | FABL3169 |     |   |   |   |   |   |    |
| FABL3170                             |     |   |   |                                    |   |   |    | FABL3170 |                                     |   |   |   |   |   |    | FABL3170 |     |   |   |   |   |   |    |
| FABL3171                             |     |   |   |                                    |   |   |    | FABL3171 |                                     |   |   |   |   |   |    | FABL3171 |     |   |   |   |   |   |    |
| FABL3172                             |     |   |   |                                    |   |   |    | FABL3172 |                                     |   |   |   |   |   |    | FABL3172 |     |   |   |   |   |   |    |
| FABL3173                             |     |   |   |                                    |   |   |    | FABL3173 |                                     |   |   |   |   |   |    | FABL3173 |     |   |   |   |   |   |    |
| FABL3174                             |     |   |   |                                    |   |   |    | FABL3174 |                                     |   |   |   |   |   |    | FABL3174 |     |   |   |   |   |   |    |
| FABL3175                             |     |   |   |                                    |   |   |    | FABL3175 |                                     |   |   |   |   |   |    | FABL3175 |     |   |   |   |   |   |    |
| FABL3176                             |     |   |   |                                    |   |   |    | FABL3176 |                                     |   |   |   |   |   |    | FABL3176 |     |   |   |   |   |   |    |
| FABL3177                             |     |   |   |                                    |   |   |    | FABL3177 |                                     |   |   |   |   |   |    | FABL3177 |     |   |   |   |   |   |    |
| FABL3178                             |     |   |   |                                    |   |   |    | FABL3178 |                                     |   |   |   |   |   |    | FABL3178 |     |   |   |   |   |   |    |
| FABL3179                             |     |   |   |                                    |   |   |    | FABL3179 |                                     |   |   |   |   |   |    | FABL3179 |     |   |   |   |   |   |    |
| FABL3180                             |     |   |   |                                    |   |   |    | FABL3180 |                                     |   |   |   |   |   |    | FABL3180 |     |   |   |   |   |   |    |
| FABL3181                             |     |   |   |                                    |   |   |    | FABL3181 |                                     |   |   |   |   |   |    | FABL3181 |     |   |   |   |   |   |    |
| FABL3182                             |     |   |   |                                    |   |   |    | FABL3182 |                                     |   |   |   |   |   |    | FABL3182 |     |   |   |   |   |   |    |
| FABL3183                             |     |   |   |                                    |   |   |    | FABL3183 |                                     |   |   |   |   |   |    | FABL3183 |     |   |   |   |   |   |    |
| FABL3184                             |     |   |   |                                    |   |   |    | FABL3184 |                                     |   |   |   |   |   |    | FABL3184 |     |   |   |   |   |   |    |
| FABL3185                             |     |   |   |                                    |   |   |    | FABL3185 |                                     |   |   |   |   |   |    | FABL3185 |     |   |   |   |   |   |    |
| FABL3186                             |     |   |   |                                    |   |   |    | FABL3186 |                                     |   |   |   |   |   |    | FABL3186 |     |   |   |   |   |   |    |
| FABL3187                             |     |   |   |                                    |   |   |    | FABL3187 |                                     |   |   |   |   |   |    | FABL3187 |     |   |   |   |   |   |    |
| FABL3188                             |     |   |   |                                    |   |   |    | FABL3188 |                                     |   |   |   |   |   |    | FABL3188 |     |   |   |   |   |   |    |
| FABL3189                             |     |   |   |                                    |   |   |    | FABL3189 |                                     |   |   |   |   |   |    | FABL3189 |     |   |   |   |   |   |    |
| FABL3190                             |     |   |   |                                    |   |   |    | FABL3190 |                                     |   |   |   |   |   |    | FABL3190 |     |   |   |   |   |   |    |
| FABL3191                             |     |   |   |                                    |   |   |    | FABL3191 |                                     |   |   |   |   |   |    | FABL3191 |     |   |   |   |   |   |    |
| FABL3192                             |     |   |   |                                    |   |   |    | FABL3192 |                                     |   |   |   |   |   |    | FABL3192 |     |   |   |   |   |   |    |
| FABL3193                             |     |   |   |                                    |   |   |    | FABL3193 |                                     |   |   |   |   |   |    | FABL3193 |     |   |   |   |   |   |    |
| FABL3194                             |     |   |   |                                    |   |   |    | FABL3194 |                                     |   |   |   |   |   |    | FABL3194 |     |   |   |   |   |   |    |
| FABL3195                             |     |   |   |                                    |   |   |    | FABL3195 |                                     |   |   |   |   |   |    | FABL3195 |     |   |   |   |   |   |    |
| FABL3196                             |     |   |   |                                    |   |   |    | FABL3196 |                                     |   |   |   |   |   |    | FABL3196 |     |   |   |   |   |   |    |
| FABL3197                             |     |   |   |                                    |   |   |    | FABL3197 |                                     |   |   |   |   |   |    | FABL3197 |     |   |   |   |   |   |    |
| FABL3198                             |     |   |   |                                    |   |   |    | FABL3198 |                                     |   |   |   |   |   |    | FABL3198 |     |   |   |   |   |   |    |
| FABL3199                             |     |   |   |                                    |   |   |    | FABL3199 |                                     |   |   |   |   |   |    | FABL3199 |     |   |   |   |   |   |    |
| FABL3200                             |     |   |   |                                    |   |   |    | FABL3200 |                                     |   |   |   |   |   |    | FABL3200 |     |   |   |   |   |   |    |

# Supplemental Figure 5

| Eth                                   |                                    |                                     |  |
|---------------------------------------|------------------------------------|-------------------------------------|--|
| Fragaria × ananassa Duch 'Barrhopper' | Fragaria × ananassa Duch 'JoyaSal' | Fragaria × ananassa 'Snow Princess' |  |
| Mock 0 1 2 4 8 9 12                   | Mock 0 1 2 4 8 9 12                | Mock 0 1 2 4 8 9 12                 |  |
| FaBRL11                               | FaBRL11                            | FaBRL11                             |  |
| FaBRL12                               | FaBRL12                            | FaBRL12                             |  |
| FaBRL13                               | FaBRL13                            | FaBRL13                             |  |
| FaBRL14                               | FaBRL14                            | FaBRL14                             |  |
| FaBRL15                               | FaBRL15                            | FaBRL15                             |  |
| FaBRL16                               | FaBRL16                            | FaBRL16                             |  |
| FaBRL17                               | FaBRL17                            | FaBRL17                             |  |
| FaBRL18                               | FaBRL18                            | FaBRL18                             |  |
| FaBRL19                               | FaBRL19                            | FaBRL19                             |  |
| FaBRL20                               | FaBRL20                            | FaBRL20                             |  |
| FaBRL21                               | FaBRL21                            | FaBRL21                             |  |
| FaBRL22                               | FaBRL22                            | FaBRL22                             |  |
| FaBRL23                               | FaBRL23                            | FaBRL23                             |  |
| FaBRL24                               | FaBRL24                            | FaBRL24                             |  |
| FaBRL25                               | FaBRL25                            | FaBRL25                             |  |
| FaBRL26                               | FaBRL26                            | FaBRL26                             |  |
| FaBRL27                               | FaBRL27                            | FaBRL27                             |  |
| FaBRL28                               | FaBRL28                            | FaBRL28                             |  |
| FaBRL29                               | FaBRL29                            | FaBRL29                             |  |
| FaBRL30                               | FaBRL30                            | FaBRL30                             |  |
| FaBRL31                               | FaBRL31                            | FaBRL31                             |  |
| FaBRL32                               | FaBRL32                            | FaBRL32                             |  |
| FaBRL33                               | FaBRL33                            | FaBRL33                             |  |
| FaBRL34                               | FaBRL34                            | FaBRL34                             |  |
| FaBRL35                               | FaBRL35                            | FaBRL35                             |  |
| FaBRL36                               | FaBRL36                            | FaBRL36                             |  |
| FaBRL37                               | FaBRL37                            | FaBRL37                             |  |
| FaBRL38                               | FaBRL38                            | FaBRL38                             |  |
| FaBRL39                               | FaBRL39                            | FaBRL39                             |  |
| FaBRL40                               | FaBRL40                            | FaBRL40                             |  |
| FaBRL41                               | FaBRL41                            | FaBRL41                             |  |
| FaBRL42                               | FaBRL42                            | FaBRL42                             |  |
| FaBRL43                               | FaBRL43                            | FaBRL43                             |  |
| FaBRL44                               | FaBRL44                            | FaBRL44                             |  |
| FaBRL45                               | FaBRL45                            | FaBRL45                             |  |
| FaBRL46                               | FaBRL46                            | FaBRL46                             |  |
| FaBRL47                               | FaBRL47                            | FaBRL47                             |  |
| FaBRL48                               | FaBRL48                            | FaBRL48                             |  |
| FaBRL49                               | FaBRL49                            | FaBRL49                             |  |
| FaBRL50                               | FaBRL50                            | FaBRL50                             |  |
| FaBRL51                               | FaBRL51                            | FaBRL51                             |  |
| FaBRL52                               | FaBRL52                            | FaBRL52                             |  |
| FaBRL53                               | FaBRL53                            | FaBRL53                             |  |
| FaBRL54                               | FaBRL54                            | FaBRL54                             |  |
| FaBRL55                               | FaBRL55                            | FaBRL55                             |  |
| FaBRL56                               | FaBRL56                            | FaBRL56                             |  |
| FaBRL57                               | FaBRL57                            | FaBRL57                             |  |
| FaBRL58                               | FaBRL58                            | FaBRL58                             |  |
| FaBRL59                               | FaBRL59                            | FaBRL59                             |  |
| FaBRL60                               | FaBRL60                            | FaBRL60                             |  |
| FaBRL61                               | FaBRL61                            | FaBRL61                             |  |
| FaBRL62                               | FaBRL62                            | FaBRL62                             |  |
| FaBRL63                               | FaBRL63                            | FaBRL63                             |  |
| FaBRL64                               | FaBRL64                            | FaBRL64                             |  |
| FaBRL65                               | FaBRL65                            | FaBRL65                             |  |
| FaBRL66                               | FaBRL66                            | FaBRL66                             |  |
| FaBRL67                               | FaBRL67                            | FaBRL67                             |  |
| FaBRL68                               | FaBRL68                            | FaBRL68                             |  |
| FaBRL69                               | FaBRL69                            | FaBRL69                             |  |
| FaBRL70                               | FaBRL70                            | FaBRL70                             |  |
| FaBRL71                               | FaBRL71                            | FaBRL71                             |  |
| FaBRL72                               | FaBRL72                            | FaBRL72                             |  |
| FaBRL73                               | FaBRL73                            | FaBRL73                             |  |
| FaBRL74                               | FaBRL74                            | FaBRL74                             |  |
| FaBRL75                               | FaBRL75                            | FaBRL75                             |  |
| FaBRL76                               | FaBRL76                            | FaBRL76                             |  |
| FaBRL77                               | FaBRL77                            | FaBRL77                             |  |
| FaBRL78                               | FaBRL78                            | FaBRL78                             |  |
| FaBRL79                               | FaBRL79                            | FaBRL79                             |  |
| FaBRL80                               | FaBRL80                            | FaBRL80                             |  |
| FaBRL81                               | FaBRL81                            | FaBRL81                             |  |
| FaBRL82                               | FaBRL82                            | FaBRL82                             |  |
| FaBRL83                               | FaBRL83                            | FaBRL83                             |  |
| FaBRL84                               | FaBRL84                            | FaBRL84                             |  |
| FaBRL85                               | FaBRL85                            | FaBRL85                             |  |
| FaBRL86                               | FaBRL86                            | FaBRL86                             |  |
| FaBRL87                               | FaBRL87                            | FaBRL87                             |  |
| FaBRL88                               | FaBRL88                            | FaBRL88                             |  |
| FaBRL89                               | FaBRL89                            | FaBRL89                             |  |
| FaBRL90                               | FaBRL90                            | FaBRL90                             |  |
| FaBRL91                               | FaBRL91                            | FaBRL91                             |  |
| FaBRL92                               | FaBRL92                            | FaBRL92                             |  |
| FaBRL93                               | FaBRL93                            | FaBRL93                             |  |
| FaBRL94                               | FaBRL94                            | FaBRL94                             |  |
| FaBRL95                               | FaBRL95                            | FaBRL95                             |  |
| FaBRL96                               | FaBRL96                            | FaBRL96                             |  |
| FaBRL97                               | FaBRL97                            | FaBRL97                             |  |
| FaBRL98                               | FaBRL98                            | FaBRL98                             |  |
| FaBRL99                               | FaBRL99                            | FaBRL99                             |  |
| FaBRL100                              | FaBRL100                           | FaBRL100                            |  |
| FaBRL101                              | FaBRL101                           | FaBRL101                            |  |
| FaBRL102                              | FaBRL102                           | FaBRL102                            |  |
| FaBRL103                              | FaBRL103                           | FaBRL103                            |  |
| FaBRL104                              | FaBRL104                           | FaBRL104                            |  |
| FaBRL105                              | FaBRL105                           | FaBRL105                            |  |
| FaBRL106                              | FaBRL106                           | FaBRL106                            |  |
| FaBRL107                              | FaBRL107                           | FaBRL107                            |  |
| FaBRL108                              | FaBRL108                           | FaBRL108                            |  |
| FaBRL109                              | FaBRL109                           | FaBRL109                            |  |
| FaBRL110                              | FaBRL110                           | FaBRL110                            |  |
| FaBRL111                              | FaBRL111                           | FaBRL111                            |  |
| FaBRL112                              | FaBRL112                           | FaBRL112                            |  |
| FaBRL113                              | FaBRL113                           | FaBRL113                            |  |
| FuA2B                                 | FuA2B                              | FuA2B                               |  |
| FuB2A12                               | FuB2A12                            | FuB2A12                             |  |
| FuG2A2D                               | FuG2A2D                            | FuG2A2D                             |  |
